# Supplementary material for: Diels–Alder reactions of 1,1,3-triarylallyl cations: determination of the free energy of concert
Source: Royal Society of Chemistry journal article supplement (doi:10.1039/b203555c), 2002-01-01
Supplement: b203555c.doc [file b203555c.doc]

**Supplementary data**

**Diels-Alder reactions of 1,1,3-triarylallyl cations:
Determination of the free energy of concert**

Claudia Fichtner and Herbert Mayr*

## Department Chemie, Ludwig-Maximilians-Universität München

Butenandtstr. 5–13 (Haus F), D-81377 München, Germany

**Table S1.** Kinetics of the reactions of 1,3,3-triphenylallyl cation (**1a**) with 1,3-dienes **2a** and **2b** (in CH2Cl2, determined spectrophotometrically at  = 510 ± 5 nm).

| *T* / °C | [**1a**]o / mol L–1 | [diene]o / mol L–1 | [ZnCl2·OEt2] / mol L–1 | Conv. / % | *k* / L mol–1 s–1 |  |
| --- | --- | --- | --- | --- | --- | --- |
| diene = isoprene (**2a**) | | | | | | |
| –49.2 | 5.19  10–5 | 4.26  10–3 | 1.44  10–2 | 85 | 9.63  10–1 |  |
| –49.4 | 3.60  10–5 | 7.39  10–4 | 1.25  10–2 | 64 | 1.04 |  |
| –49.9 | 4.42  10–5 | 1.35  10–3 | 2.15  10–2 | 76 | 9.95  10–1 |  |
| –49.9 | 4.85  10–5 | 9.90  10–4 | 1.68  10–2 | 52 | 8.73  10–1 |  |
| –50.0 | 4.32  10–5 | 2.66  10–3 | 1.80  10–2 | 80 | 9.48  10–1 |  |
| –54.5 | 4.43  10–5 | 1.81  10–3 | 1.23  10–2 | 87 | 6.67  10–1 |  |
| –59.7 | 5.60  10–5 | 2.87  10–3 | 1.56  10–2 | 83 | 4.77  10–1 |  |
| –64.6 | 4.88  10–5 | 3.01  10–3 | 2.04  10–2 | 87 | 3.17  10–1 |  |
| –66.4 | 4.50  10–5 | 2.76  10–3 | 1.56  10–2 | 89 | 2.80  10–1 |  |
| –71.8 | 4.81  10–5 | 3.93  10–3 | 2.67  10–2 | 87 | 1.84  10–1 |  |
| diene = 2,3-dimethylbutadiene (**2b**) | | | | | | |
| –49.6 | 4.79  10–5 | 3.35  10–3 | 1.70  10–2 | 66 | 3.58 |  |
| –49.6 | 4.38  10–5 | 3.51  10–3 | 1.25  10–2 | 60 | 4.11 |  |
| –49.7 | 4.27  10–5 | 1.30  10–3 | 1.52  10–2 | 72 | 3.74 |  |
| –49.9 | 4.61  10–5 | 2.31  10–3 | 1.97  10–2 | 73 | 3.58 |  |
| –49.9 | 4.31  10–5 | 8.61  10–4 | 2.14  10–2 | 79 | 3.25 |  |
| –54.7 | 4.17  10–5 | 8.35  10–4 | 2.08  10–2 | 70 | 2.37 |  |
| –55.0 | 4.28  10–5 | 1.73  10–3 | 2.13  10–2 | 64 | 2.64 |  |
| –59.4 | 2.47  10–5 | 1.41  10–3 | 1.26  10–2 | 80 | 1.78 |  |
| –60.9 | 4.33  10–5 | 2.19  10–3 | 2.16  10–2 | 72 | 1.61 |  |
| –63.9 | 3.67  10–5 | 1.10  10–3 | 1.83  10–2 | 77 | 1.20 |  |
| –70.8 | 3.94  10–5 | 1.69  10–3 | 2.00  10–2 | 75 | 6.73  10–1 |  |

Eyring activation parameters for the reaction of **1a** with **2a**:

*H*‡ = (26.40 ± 0.66) kJ mol–1;

*S*‡ = (–124.74 ± 3.03) J mol–1 K–1;

extrapolated *k*(20°C) = (36.8 ± 3.5) L mol–1 s–1.

Eyring activation parameters for the reaction of **1a** with **2b**:

*H*‡ = (28.26 ± 1.04) kJ mol–1;

*S*‡ = (–105.24 ± 4.78) J mol–1 K–1;

extrapolated *k*(20°C) = (179 ± 27) L mol–1 s–1.

**Table S2.** Kinetics of the reactions of the 1,1-bis(4-dimethylaminophenyl)-3-phenylallyl tetrafluoroborate (**1c**-BF4) with Danishefsky's diene **2c** (in CH2Cl2, determined spectrophotometrically at  = 675 nm).

| *T* / °C | [**1c**]o / mol L–1 | [**2c**]o / mol L–1 | Conv. / % | *k* / L mol–1 s–1 |
| --- | --- | --- | --- | --- |
| 20.0 | 3.09  10–5 | 3.07  10–3 | 65 | 3.42  10–1 |
| 20.0 | 3.88  10–5 | 2.89  10–3 | 47 | 3.70  10–1 |
| 20.0 | 3.80  10–5 | 9.44  10–4 | 42 | 3.91  10–1 |
| 20.0 | 3.85  10–5 | 1.92  10–3 | 65 | 3.73  10–1 |
| 20.0 | 3.95  10–5 | 1.93  10–3 | 60 | 3.84  10–1 |

averaged *k*(20°C) = (0.372 ± 0.017) L mol–1 s–1

**Table S3.** Kinetics of the reactions of the 1,1,3-tris(4-dimethylaminophenyl)allyl tetrafluoroborate (**1d**-BF4) with Danishefsky's diene **2c** (in CH2Cl2, determined spectrophotometrically at  = 600 nm).

| *T* / °C | [**1d**]o / mol L–1 | [**2c**]o / mol L–1 | Conv. / % | *k* / L mol–1 s–1 |
| --- | --- | --- | --- | --- |
| 20.0 | 3.77  10–5 | 9.48  10–4 | 41 | 7.52  10–2 |
| 20.0 | 3.74  10–5 | 3.76  10–3 | 83 | 8.02  10–2 |
| 20.0 | 3.79  10–5 | 2.86  10–3 | 69 | 8.33  10–2 |
| 20.0 | 4.04  10–5 | 2.03  10–3 | 74 | 9.39  10–2 |

averaged *k*(20°C) = (8.32 ± 0.68) × 10–2 L mol–1 s–1
